# Supplementary material for: Evaluation of Climatological Precipitation Datasets and Their Hydrological Application in the Hablehroud Watershed, Iran
Source: MDPI journal article supplement (doi:10.3390/w16071028), 2024-04-02
Supplement: s1 [file s1]

---

Supplementary material for “Evaluation of Climatological Precipitation Datasets and their Hydrological Application in Hablehroud Watershed, Iran”.

**Hossein Salehi <sup>1</sup>, Saeid Gharechelou <sup>2</sup>, Saeed Golian <sup>3</sup>, Mohammadreza Ranjbari <sup>4</sup>, Babak Ghazi <sup>5\*</sup>**

<sup>1</sup> Department of Civil, Environmental and Mechanical Engineering, University of Trento, Italy Hossein.salehi@unitn.it

<sup>2</sup> Faculty of Civil Engineering, Shahrood University of Technology, Shahrood, Iran, sgharechelo@shahroodut.ac.ir

<sup>3</sup> SKR Consulting, Birmingham, UK, s.golian@srk.kz

<sup>4</sup> School of Civil Engineering, Isfahan University of Technology, Isfahan, Iran

<sup>5</sup> Faculty of Earth Sciences and Spatial Management, Department of Meteorology and Climatology, Nicolaus Copernicus University, Toruń, Poland

\* Correspondence: Babak.ghazi@doktorant.umk.pl;

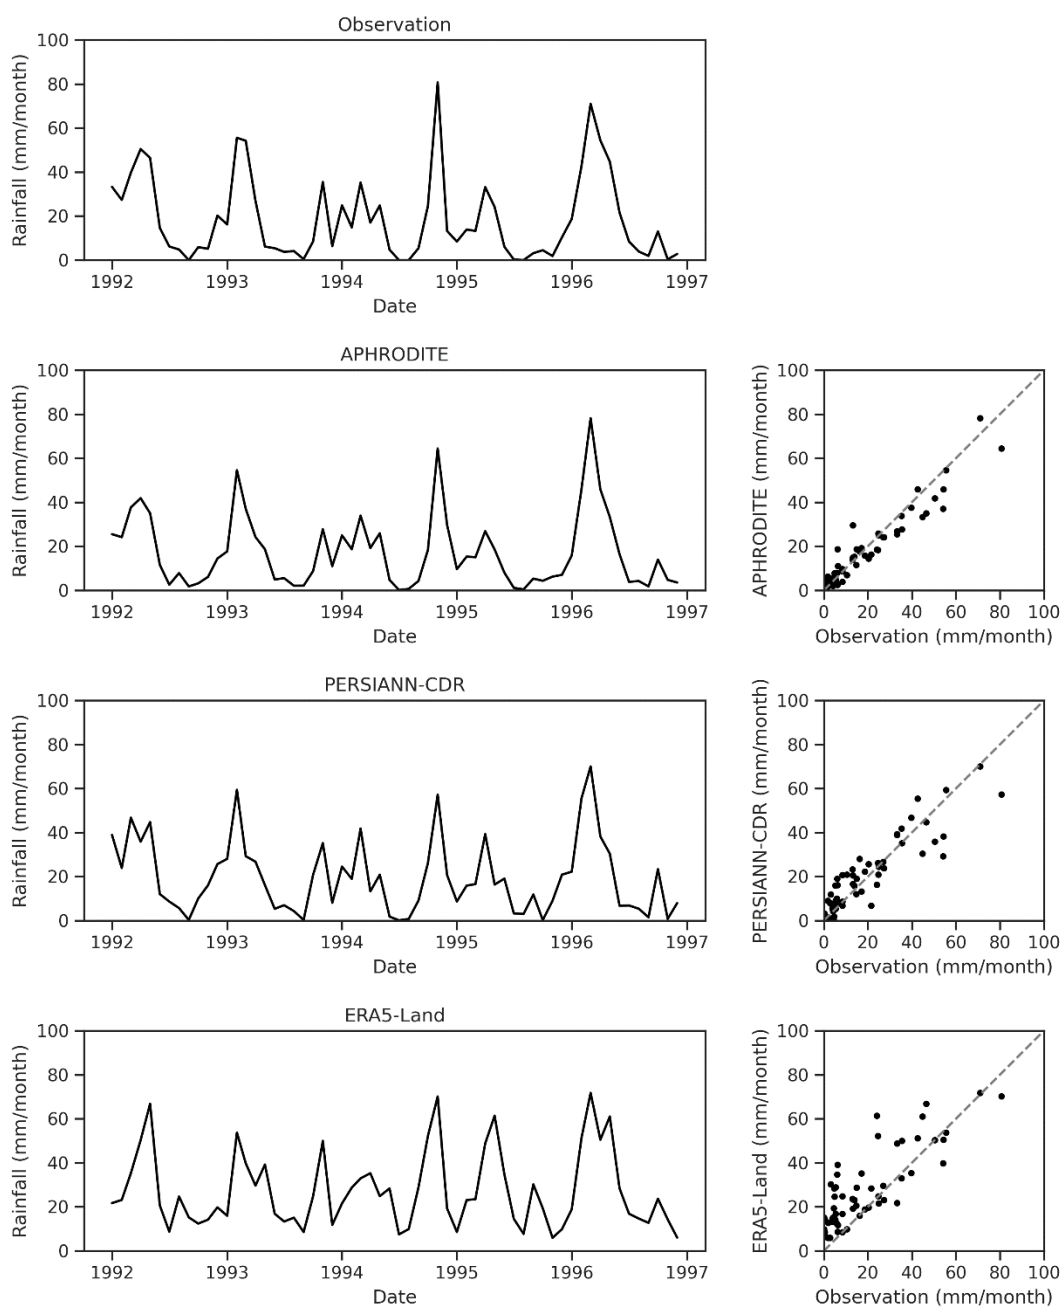

**Figure S1.** Monthly average rainfall during 1992-1996 over the Hablehroud basin.

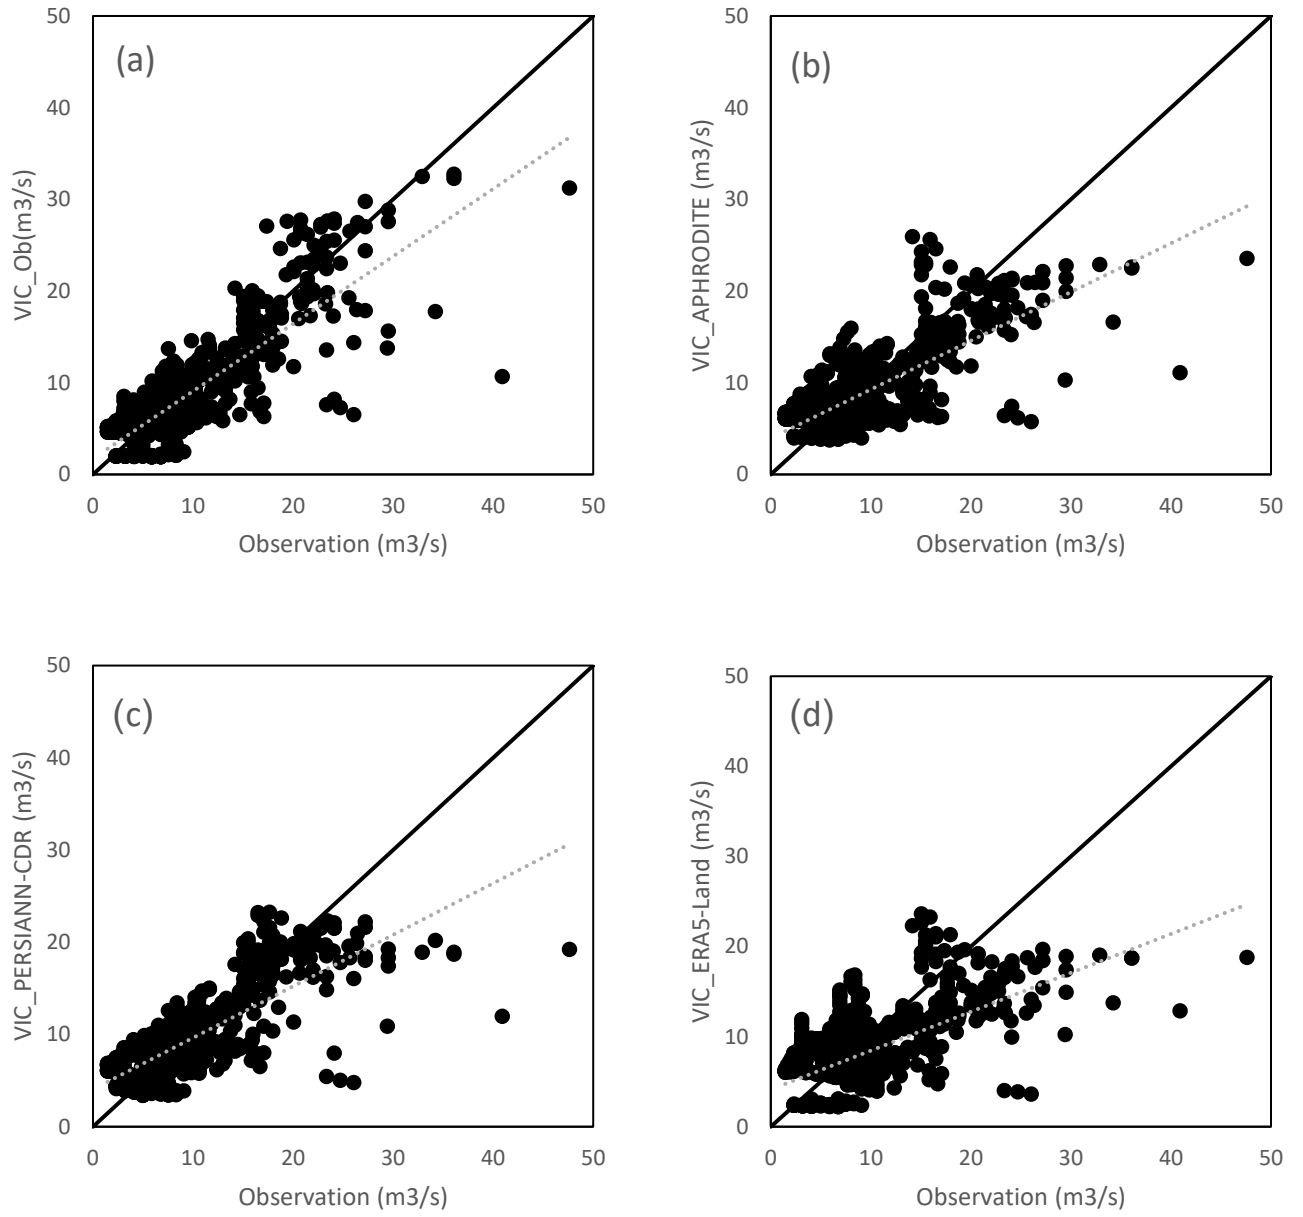

**Figure S2.** Scatter plot of monthly observation streamflow (horizontal axis) and simulated daily streamflow using: (a) Observed rain gauge stations (vertical axis); (b) APHRODITE dataset (vertical axis); (c) PERSIANN-CDR dataset (vertical axis); (d) ERA5-Land (vertical axis) in calibration period.

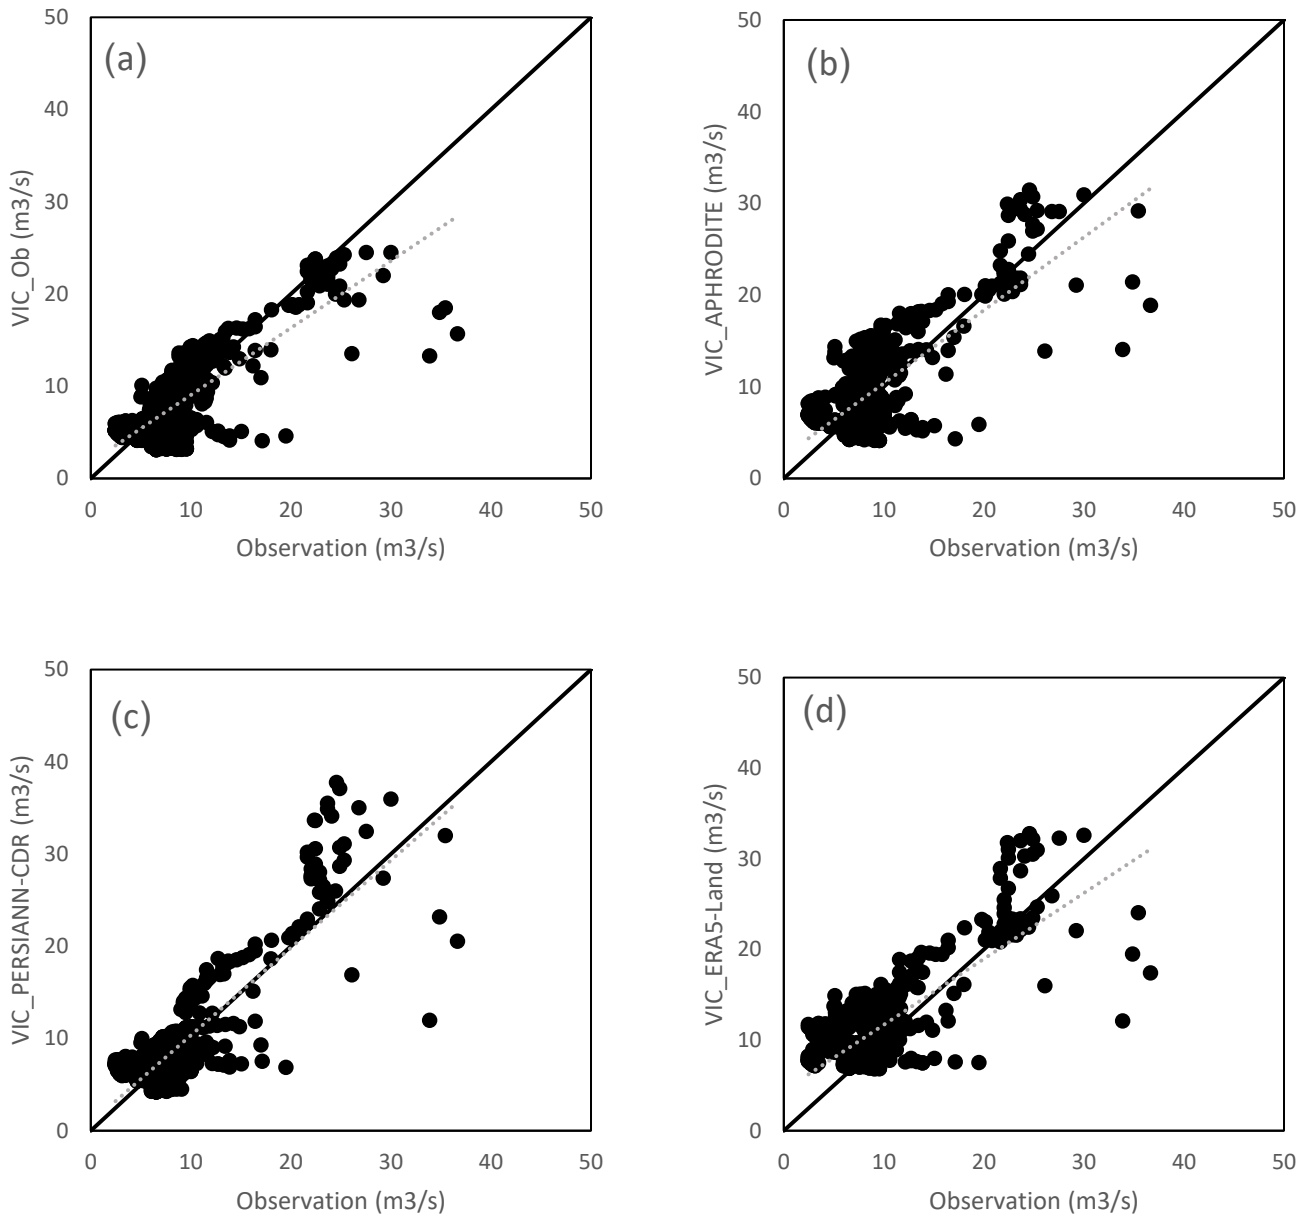

**Figure S3.** Scatter plot of monthly observation streamflow (horizontal axis) and simulated daily streamflow using: (a) Observed rain gauge stations (vertical axis); (b) APHRODITE dataset (vertical axis); (c) PERSIANN-CDR dataset (vertical axis); (d) ERA5-Land (vertical axis) in validation period.

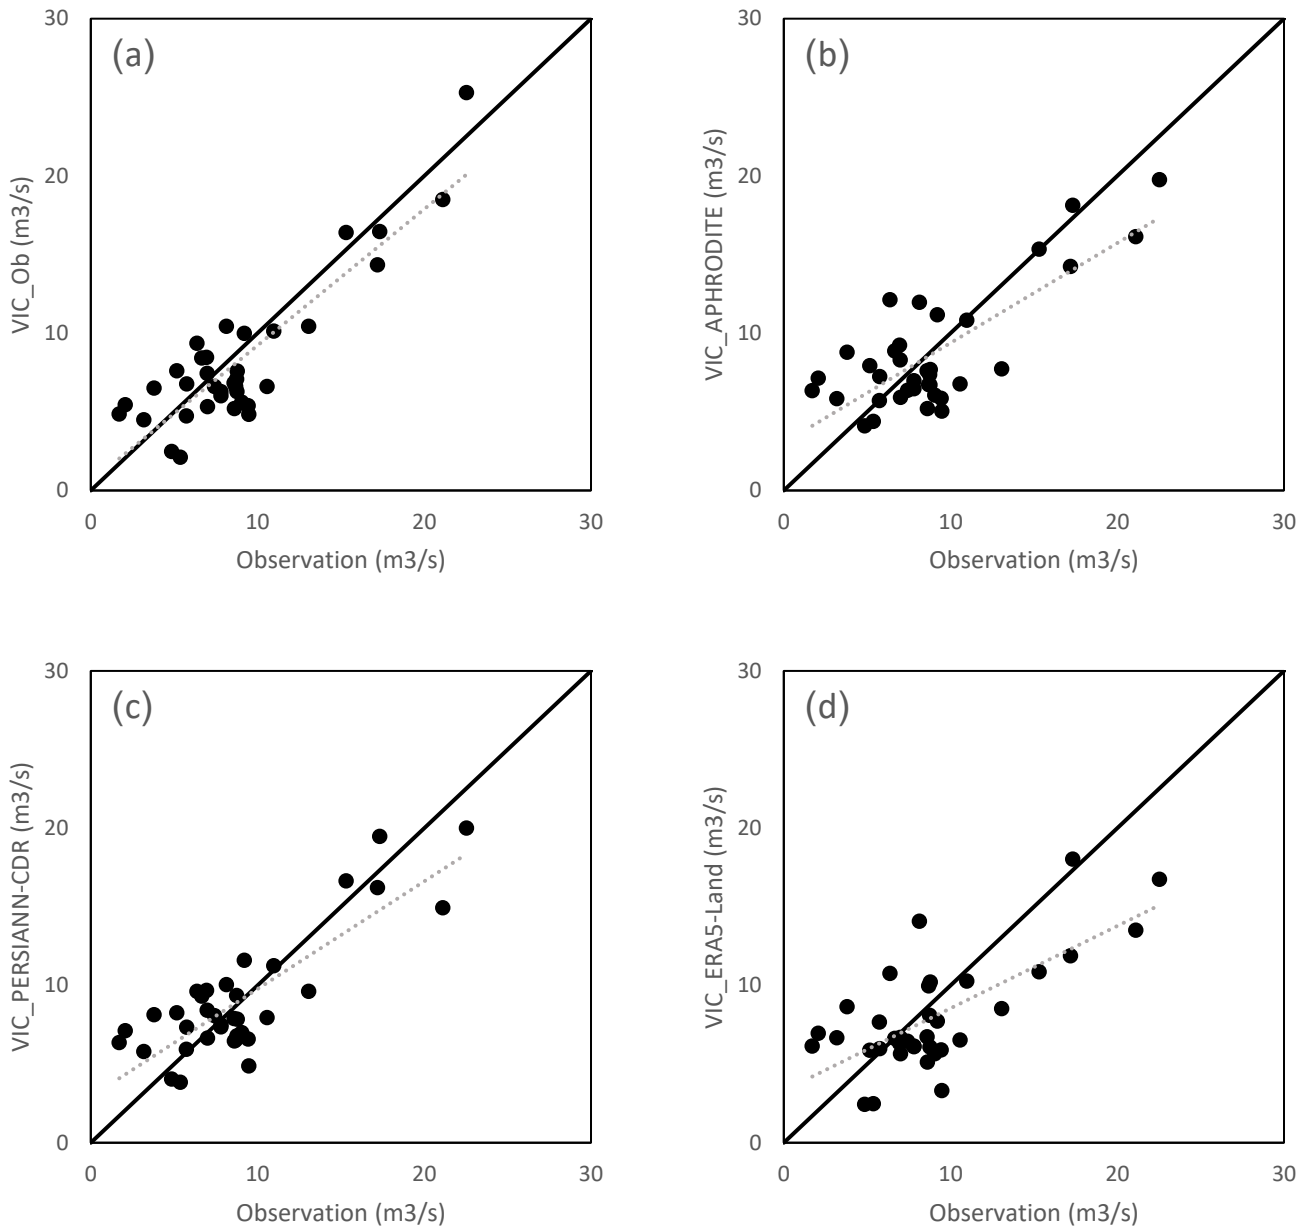

**Figure S4.** Scatter plot of monthly observation streamflow (horizontal axis) and simulated monthly streamflow using: (a) Observed rain gauge stations (vertical axis); (b) APHRODITE dataset (vertical axis); (c) PERSIANN-CDR dataset (vertical axis); (d) ERA5-Land (vertical axis) in calibration period.

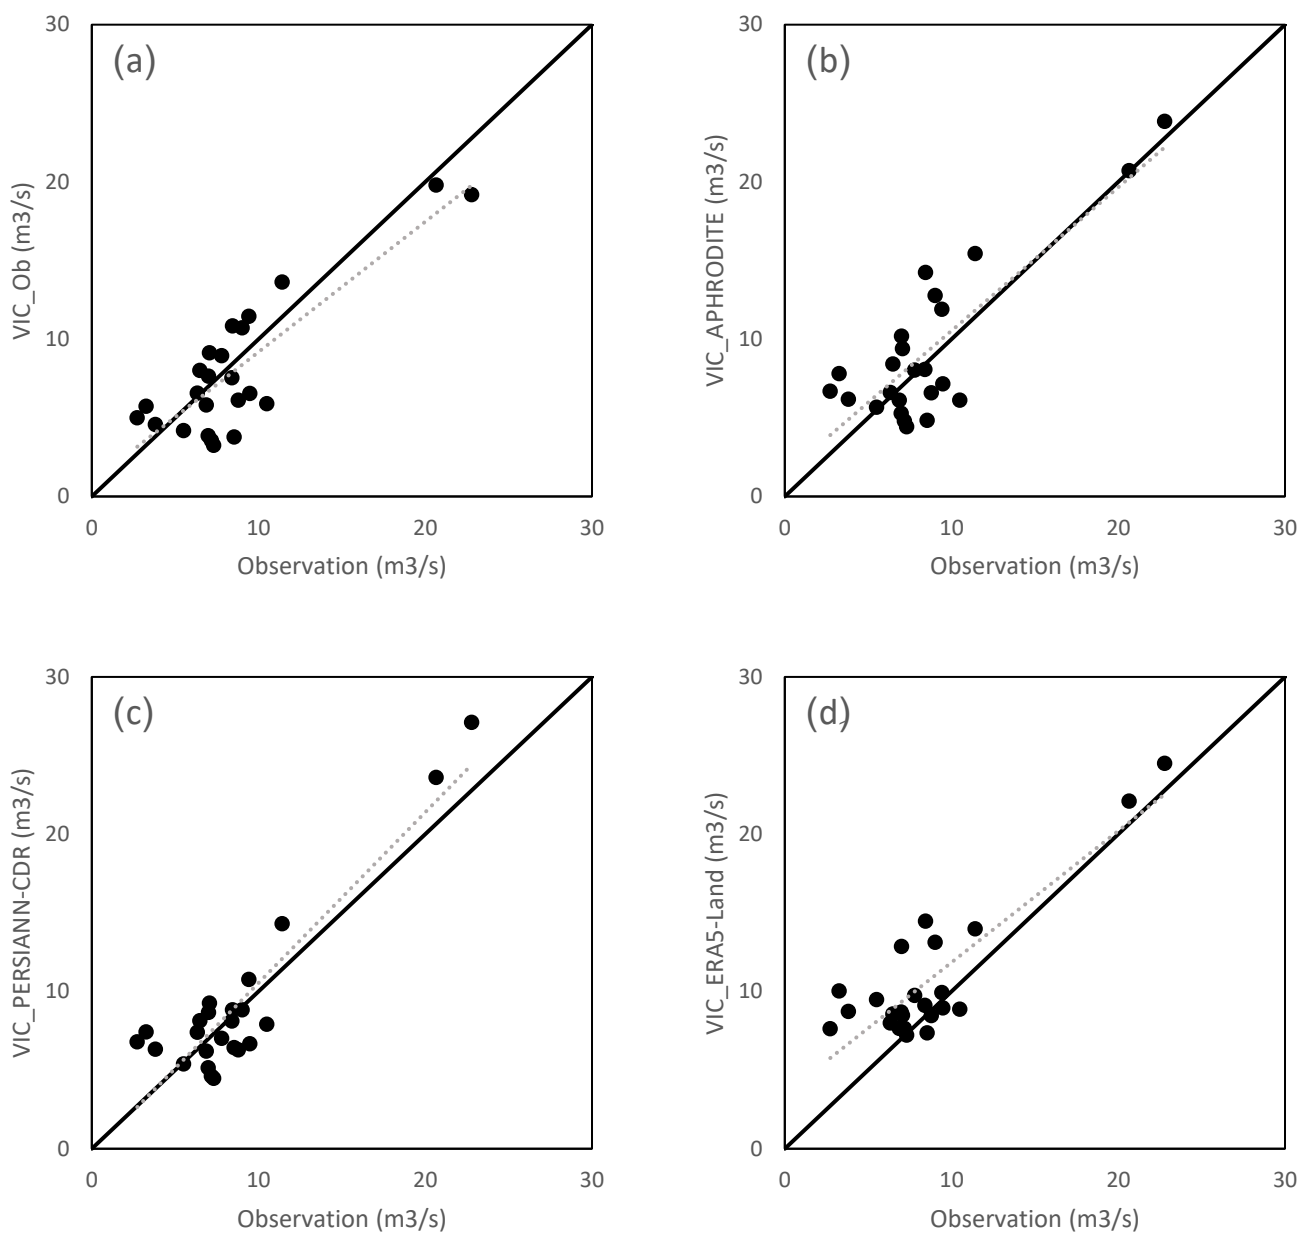

**Figure S5.** Scatter plot of monthly observation streamflow (horizontal axis) and simulated monthly streamflow using: (a) Observed rain gauge station (vertical axis); (b) APHRODITE dataset (vertical axis); (c) PERSIANN-CDR dataset (vertical axis); (d) ERA5-Land (vertical axis) in validation period.

Correlation Coefficient of APHRODITE dataset

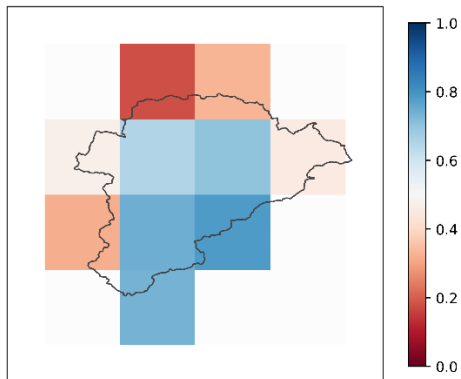

Correlation Coefficient of ERA5-Land dataset

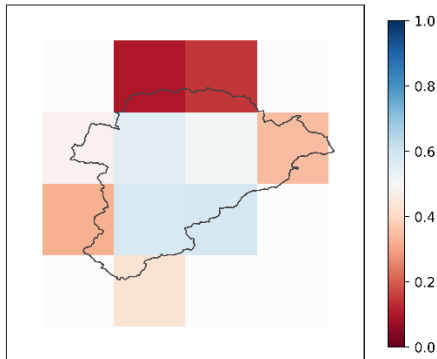

Correlation Coefficient of PERSIANN-CDR dataset

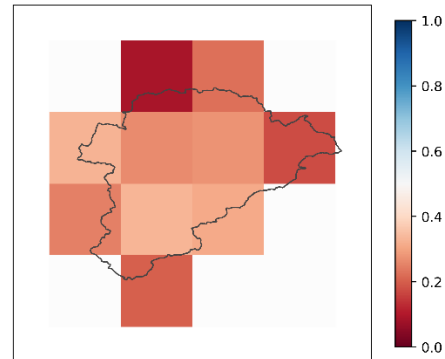

PBias of APHRODITE dataset

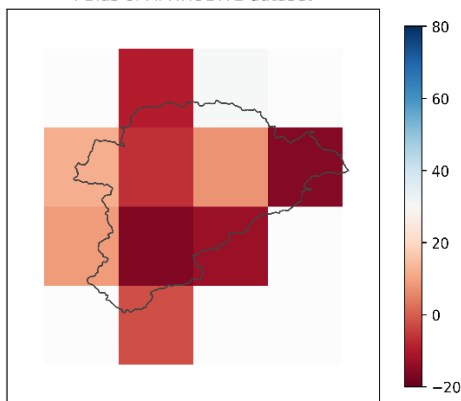

PBias of ERA5-Land dataset

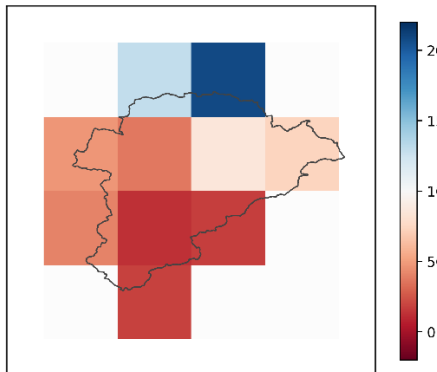

PBias of PERSIANN-CDR dataset

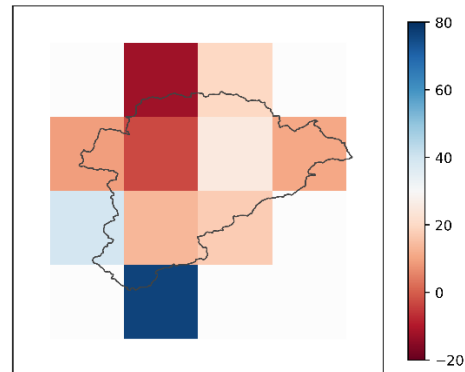

RMSE of APHRODITE dataset

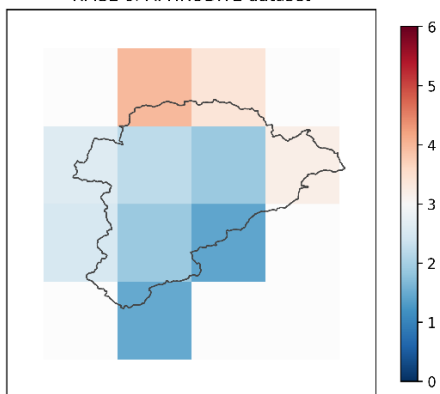

RMSE of ERA5-Land dataset

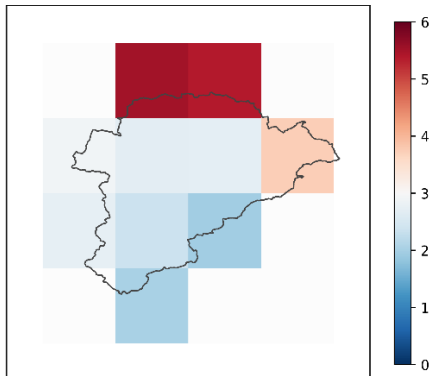

RMSE of PERSIANN-CDR dataset

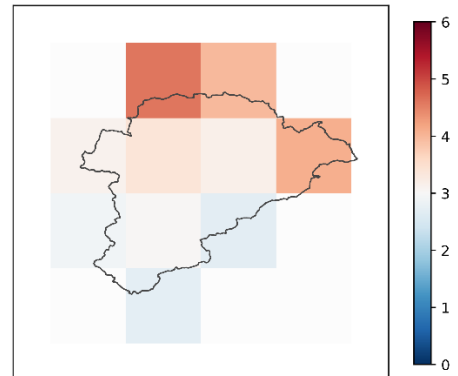

KGE of APHRODITE dataset

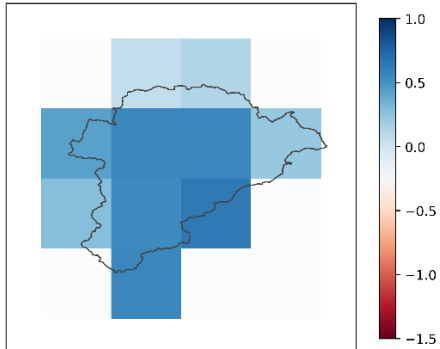

KGE of ERA5-Land dataset

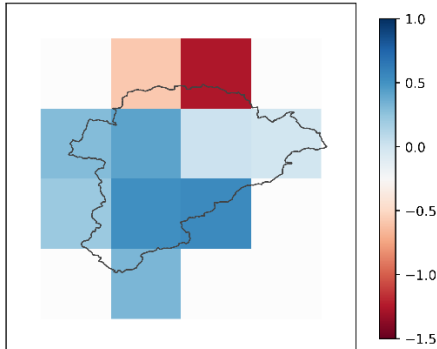

KGE of PERSIANN-CDR dataset

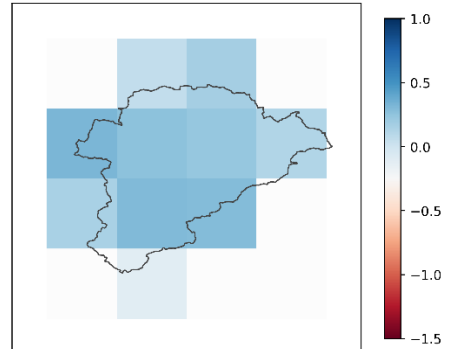

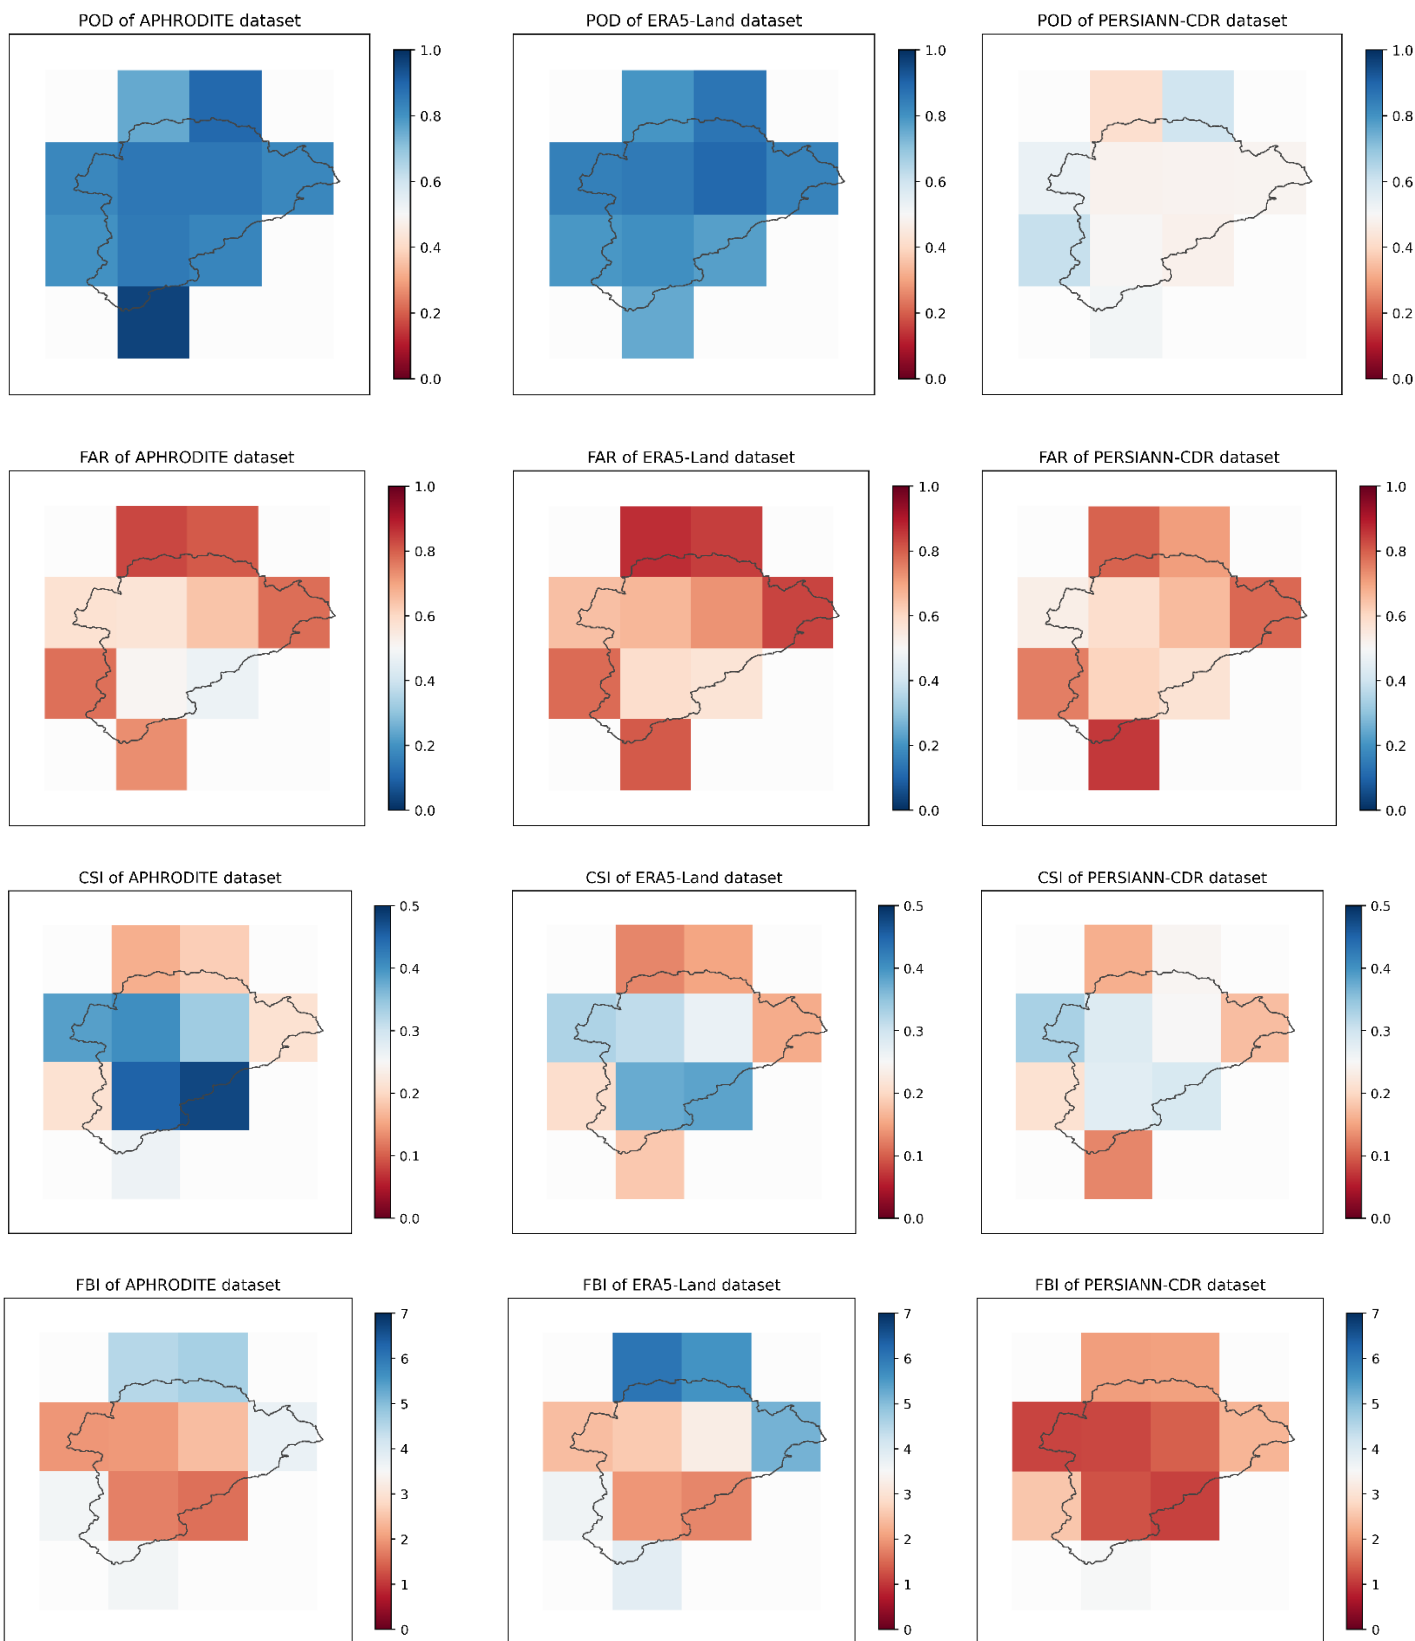



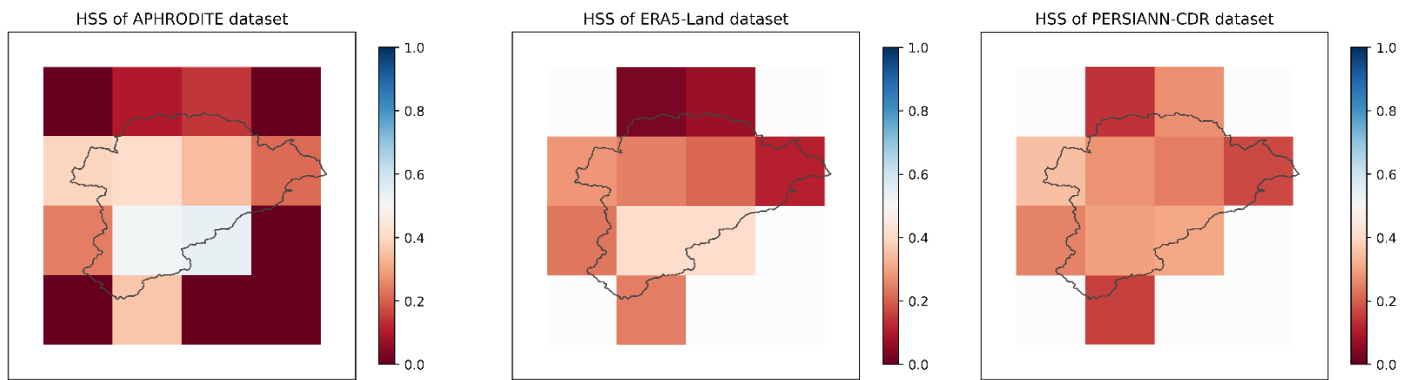

**Figure S6.** Distribution of CC, PBias, RMSE, KGE, POD, FAR, and CSI of APHRPDATE (column 1), ERA5-Land (column 2), and PERSIANN-CDR (column 3) datasets over the Hablehroud watershed.

Table s1. Statistical metrics used for evaluating of precipitation datasets and simulated runoff

|    | Index                                                                                                                                                                              | Unit   | Description                                                                                                                                                                |
|----|------------------------------------------------------------------------------------------------------------------------------------------------------------------------------------|--------|----------------------------------------------------------------------------------------------------------------------------------------------------------------------------|
| 1  | $CC = \frac{\sum_{t=1}^n (P_{o,t} - \overline{P_o})(P_{s,t} - \overline{P_s})}{\sqrt{\sum_{t=1}^n (P_{o,t} - \overline{P_o})^2} \sqrt{\sum_{t=1}^n (P_{s,t} - \overline{P_s})^2}}$ | /      | $P_{s,t}$ is the climatological precipitation in time step t<br>$P_{o,t}$ is the Observation precipitation in time step t                                                  |
| 2  | $PBias = \frac{\sum_{t=1}^n (P_{s,t} - P_{o,t})}{\sum_{t=1}^n P_{o,t}} * 100$                                                                                                      | %      | $\overline{P_s} = \frac{1}{n} \sum_{t=1}^n P_{s,t}$ , $\overline{P_o} = \frac{1}{n} \sum_{t=1}^n P_{o,t}$                                                                  |
| 3  | $POD = H / (H + M)$                                                                                                                                                                | /      | $H$ is the observed precipitation correctly detected.                                                                                                                      |
| 4  | $FAR = F / (F + H)$                                                                                                                                                                | /      | $M$ is the observed precipitation not detected.                                                                                                                            |
| 5  | $CSI = H / (F + H + M)$                                                                                                                                                            | /.     | $F$ is the precipitation detected but not observed                                                                                                                         |
| 6  | $FBI = (H + F) / (M + H)$                                                                                                                                                          | /      | $Z$ is the precipitation not detected correctly                                                                                                                            |
| 7  | $HSS = \frac{2(ZH - FM)}{(Z + F)(F + H) + (M + H)(Z + M)}$                                                                                                                         |        |                                                                                                                                                                            |
| 8  | $KGE = \sqrt{(1 - CC)^2 + (\alpha - 1)^2 + (\beta - 1)^2}$<br>$\beta = \frac{\sigma_s}{\sigma_o}, \alpha = \frac{\mu_s}{\mu_o}$                                                    | /      | $\sigma_s$ simulation time series variance, $\sigma_o$ observation time series variance<br>$\mu_s$ simulation time series average, $\mu_o$ observation time series average |
| 9  | $RMSE = \sqrt{\frac{\sum_{t=1}^n (P_{s,t} - P_{o,t})^2}{n}}$                                                                                                                       | mm/day |                                                                                                                                                                            |
| 10 | $NSE = 1 - \frac{\sum_{t=1}^n (P_{s,t} - P_{o,t})^2}{\sum_{t=1}^n (P_{o,t} - \overline{P_o})^2}$                                                                                   | /      |                                                                                                                                                                            |
